# Supplementary material for: A comparative 2 and 4-probe DC and 2-probe AC electrical conductivity of novel co-doped Ce0.9−xRExMo0.1O2.1–0.5x (RE = Y, Sm, Gd; x = 0.2, 0.3)
Source: Royal Society of Chemistry journal article supplement (doi:10.1039/c0jm01324b), 2010-01-01
Supplement: c0jm01324b.pdf [file c0jm01324b.pdf]

## Supporting Information

### A comparative 2 and 4-probe DC and 2-Probe AC electrical conductivity of novel co-doped

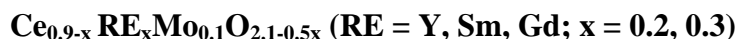

Qin Li and Venkataraman Thangadurai\*

*Department of Chemistry, University of Calgary, 2500 University Drive NW, Calgary, AB, T2N 1N4 Canada*

\* Correspondence E-mail: vthangad@ucalgary.ca. Tel.: 001 (403) 210 8649; Fax: 001 (403) 289 9488.

**Table S1** The band gap from the diffuse reflectance spectra

**Table S2** Fitting parameters of the impedance for  $\text{Ce}_{0.6}\text{RE}_{0.3}\text{Mo}_{0.1}\text{O}_{1.95}$  (M = Sm, Gd) in air at 350 °C.

**Table S3** Fitting parameters of the impedance for  $\text{Ce}_{0.6}\text{RE}_{0.3}\text{Mo}_{0.1}\text{O}_{1.95}$  (RE = Sm, Gd) in air at 550 and 650 °C.

**Table S4** Fitting parameters of the impedance for  $\text{Ce}_{0.6}\text{RE}_{0.3}\text{Mo}_{0.1}\text{O}_{1.95}$  (RE = Sm, Gd) in air at 750 °C.

**Fig. S1** PXRD patterns of (a)  $\text{Ce}_{0.7}\text{Sm}_{0.2}\text{Mo}_{0.1}\text{O}_2$  (b)  $\text{Ce}_{0.7}\text{Gd}_{0.2}\text{Mo}_{0.1}\text{O}_2$  and (c)  $\text{Ce}_{0.7}\text{Y}_{0.2}\text{Mo}_{0.1}\text{O}_2$  prepared in air at elevated temperatures.

**Fig. S2** Diffuse reflectance spectra of as prepared  $\text{Ce}_{0.7}\text{Gd}_{0.2}\text{Mo}_{0.1}\text{O}_2$  and  $\text{Ce}_{0.6}\text{Gd}_{0.3}\text{Mo}_{0.1}\text{O}_{1.95}$ . For comparison, the starting materials are also given. Band value was estimated as described in ref. (65).

**Fig. S3** FTIR spectra of as prepared  $\text{Ce}_{0.7}\text{Gd}_{0.2}\text{Mo}_{0.1}\text{O}_2$  and  $\text{Ce}_{0.6}\text{Gd}_{0.3}\text{Mo}_{0.1}\text{O}_{1.95}$ . For comparison, the starting materials are also given.

**Fig. S4** Scanning electron microscopy (SEM) images (10  $\mu\text{m}$ ) of as-prepared  $\text{Ce}_{0.7}\text{RE}_{0.2}\text{Mo}_{0.1}\text{O}_2$  (a) = Sm; (b) = Gd and (c) = Y. Insets show the diagram at 20  $\mu\text{m}$ . Their corresponding EDX images are given in (d) –(f).

**Fig. S5** Typical AC resistivity plots of  $\text{Ce}_{0.7}\text{Gd}_{0.2}\text{Mo}_{0.1}\text{O}_2$  and  $\text{Ce}_{0.6}\text{Gd}_{0.3}\text{Mo}_{0.1}\text{O}_2$  at 350 °C in (a) air and (b) wet  $\text{H}_2$ . Insets show the expanded view.

**Fig. S6** Arrhenius plots for bulk electrical conductivity of (a)  $\text{Ce}_{0.7}\text{Sm}_{0.2}\text{Mo}_{0.1}\text{O}_2$  (b)  $\text{Ce}_{0.7}\text{Gd}_{0.2}\text{Mo}_{0.1}\text{O}_2$  and (c)  $\text{Ce}_{0.7}\text{Y}_{0.2}\text{Mo}_{0.1}\text{O}_2$  in air and wet  $\text{H}_2$  determined by 2-probe electrical measurements using Pt electrodes. About four to five orders of magnitude higher electrical conductivity was observed in wet  $\text{H}_2$ . For comparison, 4-probe DC electrical conductivity data in wet  $\text{H}_2$  was included.

**Fig. S7** Powder X-ray diffraction patterns of (a)  $\text{Ce}_{0.7}\text{Sm}_{0.2}\text{Mo}_{0.1}\text{O}_2$  (b)  $\text{Ce}_{0.7}\text{Gd}_{0.2}\text{Mo}_{0.1}\text{O}_2$  and (c)  $\text{Ce}_{0.7}\text{Y}_{0.2}\text{Mo}_{0.1}\text{O}_2$  after AC impedance measurement up to 700°C in wet  $\text{H}_2$ .

**Fig. S8** Powder X-ray diffraction patterns of (a)  $\text{Ce}_{0.6}\text{Sm}_{0.3}\text{Mo}_{0.1}\text{O}_{1.95}$  (b)  $\text{Ce}_{0.6}\text{Gd}_{0.3}\text{Mo}_{0.1}\text{O}_{1.95}$  and (c)  $\text{Ce}_{0.6}\text{Y}_{0.3}\text{Mo}_{0.1}\text{O}_{1.95}$  after AC impedance measurement up to 700°C in wet  $\text{H}_2$ .

**Fig. S9** (a) Typical variation of electrical current as a function of time of  $\text{Ce}_{0.6}\text{Gd}_{0.3}\text{Mo}_{0.1}\text{O}_{1.95}$  in wet  $\text{H}_2$  at 450 °C for the 2- probe DC measurement with the applied potential of 0.1 V and 0.4 V. It demonstrates that an initial transient current converges on a steady-state current for an applied bias of 0.1 and 0.4 V at 450 °C. For clarity, we have shown both current and time in the log scale. A steady state current was observed within 1 Sec. In (b), we show the variation of voltage as a function of time for  $\text{Ce}_{0.6}\text{Gd}_{0.3}\text{Mo}_{0.1}\text{O}_{1.95}$  in wet  $\text{H}_2$  at 450 °C using the 4-probe DC measurement. A similar behavior was observed for the Sm and Y compounds.

**Fig. S10** PXRD patterns showing the chemical stability of  $\text{Ce}_{0.7}\text{Sm}_{0.2}\text{Mo}_{0.1}\text{O}_2$  with YSZ after sintering the reaction mixture (1:1 weight ratio) at (a) 1000°C, (b) 900°C and (c) 800°C in wet  $\text{H}_2$  for 24 h. For comparison, (d) the mixture of  $\text{Ce}_{0.7}\text{Sm}_{0.2}\text{Mo}_{0.1}\text{O}_2$  with YSZ, (e) the starting materials YSZ powders and (f) as-prepared  $\text{Ce}_{0.7}\text{Sm}_{0.2}\text{Mo}_{0.1}\text{O}_2$  are shown. New phases due to Mo (JCPDS Card No 42- 1120) and  $\text{Zr}_{0.4}\text{Ce}_{0.6}\text{O}_2$  (JCPDS Card No. 38-1439) are marked with \* and #, respectively.

**Table S1** Estimated band gap from the diffuse reflectance spectra

| Composition                                                    | Eg (eV) | Literature values Eg (eV)                                                                                                                                                                                                           |
|----------------------------------------------------------------|---------|-------------------------------------------------------------------------------------------------------------------------------------------------------------------------------------------------------------------------------------|
| $\text{CeO}_2$                                                 | 3.31    | Present work<br>3.31, <sup>60</sup> 3.1, <sup>61</sup> 3.55, <sup>62</sup> 3.19-(bulk) <sup>63</sup> 3.15, <sup>64</sup> 3.35 <sup>65</sup>                                                                                         |
| $\text{Ce}_{0.7}\text{Gd}_{0.2}\text{Mo}_{0.1}\text{O}_2$      | 3.07    | Present work                                                                                                                                                                                                                        |
| $\text{Ce}_{0.6}\text{Gd}_{0.3}\text{Mo}_{0.1}\text{O}_{1.95}$ | 3.09    | Present work                                                                                                                                                                                                                        |
| $\text{MoO}_3$                                                 | 3.15    | Present work<br>3.15 (polycrystalline thin film), <sup>66</sup> 3.0-3.4 (amorphous film), <sup>67</sup><br>2.9 (bulk), <sup>68</sup> 3.05, <sup>69</sup> 3.16 (amorphous film), <sup>70</sup> 3.27 (crystalline film) <sup>70</sup> |

**Table S2** Fitting parameters of the impedance for Ce<sub>0.6</sub>RE<sub>0.3</sub>Mo<sub>0.1</sub>O<sub>1.95</sub> (M = Sm, Gd) in air at 350 °C.

| Compound                                                                | R1 (Ω)                 | Q1 (F)                   |                          | R2 (Ω)                 | Q2 (F)                  |                         | <sup>a</sup> R3 (Ω)     | Q3 (F)                  |  |
|-------------------------------------------------------------------------|------------------------|--------------------------|--------------------------|------------------------|-------------------------|-------------------------|-------------------------|-------------------------|--|
|                                                                         |                        | n1                       | C1(F)                    |                        | n2                      | C2 (F)                  |                         | n3                      |  |
| Ce <sub>0.6</sub> Sm <sub>0.3</sub> Mo <sub>0.1</sub> O <sub>1.95</sub> | 6.73 × 10 <sup>3</sup> | 6.09 × 10 <sup>-10</sup> | 1.84 × 10 <sup>-11</sup> | 1.69 × 10 <sup>5</sup> | 1.40 × 10 <sup>-7</sup> | 4.87 × 10 <sup>-8</sup> | 2.77 × 10 <sup>12</sup> | 5.79 × 10 <sup>-5</sup> |  |
|                                                                         |                        | 0.78                     |                          |                        | 0.78                    |                         |                         | 0.26                    |  |
| Ce <sub>0.6</sub> Gd <sub>0.3</sub> Mo <sub>0.1</sub> O <sub>1.95</sub> | 1.10 × 10 <sup>4</sup> | 1.76 × 10 <sup>-9</sup>  | 2.59 × 10 <sup>-11</sup> | 1.38 × 10 <sup>5</sup> | 2.15 × 10 <sup>-7</sup> | 5.85 × 10 <sup>-8</sup> | 3.22 × 10 <sup>14</sup> | 1.11 × 10 <sup>-4</sup> |  |
|                                                                         |                        | 0.72                     |                          |                        | 0.73                    |                         |                         | 0.38                    |  |

<sup>a</sup>Extrapolated value.

**Table S3** Fitting parameters of the impedance for Ce<sub>0.6</sub>RE<sub>0.3</sub>Mo<sub>0.1</sub>O<sub>1.95</sub> (RE = Sm, Gd) in air at 550 and 650 °C.

| Compound                                                                | T (°C) | R1 (Ω)                 | R2 (Ω)                 | Q2 (F)                  |                         | R3 (Ω)                 | Q3 (F)                  |                         | R4 (Ω)                 | Q4 (F)                  |                         |
|-------------------------------------------------------------------------|--------|------------------------|------------------------|-------------------------|-------------------------|------------------------|-------------------------|-------------------------|------------------------|-------------------------|-------------------------|
|                                                                         |        |                        |                        | n2                      | C2(F)                   |                        | n3                      | C3(F)                   |                        | n4                      | C4(F)                   |
| Ce <sub>0.6</sub> Sm <sub>0.3</sub> Mo <sub>0.1</sub> O <sub>1.95</sub> | 550    | 1.84 × 10 <sup>2</sup> | 3.60 × 10 <sup>2</sup> | 1.06 × 10 <sup>-6</sup> | 1.06 × 10 <sup>-6</sup> | 1.52 × 10 <sup>3</sup> | 2.14 × 10 <sup>-5</sup> | 2.73 × 10 <sup>-7</sup> | 7.38 × 10 <sup>3</sup> | 2.46 × 10 <sup>-3</sup> | 2.40 × 10 <sup>-2</sup> |
|                                                                         |        |                        |                        | 1.00                    |                         |                        | 0.44                    |                         |                        | 0.56                    |                         |
|                                                                         | 650    | 61.48                  | 89.85                  | 1.41 × 10 <sup>-6</sup> | 8.79 × 10 <sup>-7</sup> | 1.44 × 10 <sup>2</sup> | 2.46 × 10 <sup>-4</sup> | 8.33 × 10 <sup>-7</sup> | 3.79 × 10 <sup>2</sup> | 9.68 × 10 <sup>-3</sup> | 2.69 × 10 <sup>-2</sup> |
|                                                                         |        |                        |                        | 0.95                    |                         |                        | 0.37                    |                         |                        | 0.56                    |                         |
| Ce <sub>0.6</sub> Gd <sub>0.3</sub> Mo <sub>0.1</sub> O <sub>1.95</sub> | 550    | 2.31 × 10 <sup>2</sup> | 3.25 × 10 <sup>2</sup> | 2.02 × 10 <sup>-6</sup> | 2.02 × 10 <sup>-6</sup> | 1.18 × 10 <sup>3</sup> | 2.26 × 10 <sup>-5</sup> | 2.24 × 10 <sup>-7</sup> | 7.33 × 10 <sup>3</sup> | 1.78 × 10 <sup>-3</sup> | 9.86 × 10 <sup>-3</sup> |
|                                                                         |        |                        |                        | 1.00                    |                         |                        | 0.44                    |                         |                        | 0.60                    |                         |
|                                                                         | 650    | 66.96                  | 75.76                  | 1.89 × 10 <sup>-6</sup> | 1.07 × 10 <sup>-6</sup> | 121.4                  | 1.87 × 10 <sup>-4</sup> | 6.40 × 10 <sup>-7</sup> | 4.55 × 10 <sup>2</sup> | 5.74 × 10 <sup>-3</sup> | 1.26 × 10 <sup>-2</sup> |
|                                                                         |        |                        |                        | 0.94                    |                         |                        | 0.40                    |                         |                        | 0.55                    |                         |

**Table S4** Fitting parameters of the impedance for  $\text{Ce}_{0.6}\text{RE}_{0.3}\text{Mo}_{0.1}\text{O}_{1.95}$  (RE = Sm, Gd) in air at 750 °C.

| Compound                                                       | Q2 (F)          |                 |                       |                       | Q3 (F)          |                       |                       |
|----------------------------------------------------------------|-----------------|-----------------|-----------------------|-----------------------|-----------------|-----------------------|-----------------------|
|                                                                | R1 ( $\Omega$ ) | R2 ( $\Omega$ ) | n2                    | C2(F)                 | R3 ( $\Omega$ ) | n3                    | C3(F)                 |
| $\text{Ce}_{0.6}\text{Sm}_{0.3}\text{Mo}_{0.1}\text{O}_{1.95}$ | 31.61           | 30.33           | $6.11 \times 10^{-6}$ | $5.41 \times 10^{-7}$ | 40.54           | $2.78 \times 10^{-2}$ | $3.41 \times 10^{-2}$ |
|                                                                |                 |                 | 0.78                  |                       |                 | 0.37                  |                       |
| $\text{Ce}_{0.6}\text{Gd}_{0.3}\text{Mo}_{0.1}\text{O}_{1.95}$ | 32.76           | 29.81           | $9.94 \times 10^{-6}$ | $6.63 \times 10^{-7}$ | 41.95           | $1.51 \times 10^{-2}$ | $9.21 \times 10^{-3}$ |
|                                                                |                 |                 | 0.75                  |                       |                 | 0.48                  |                       |

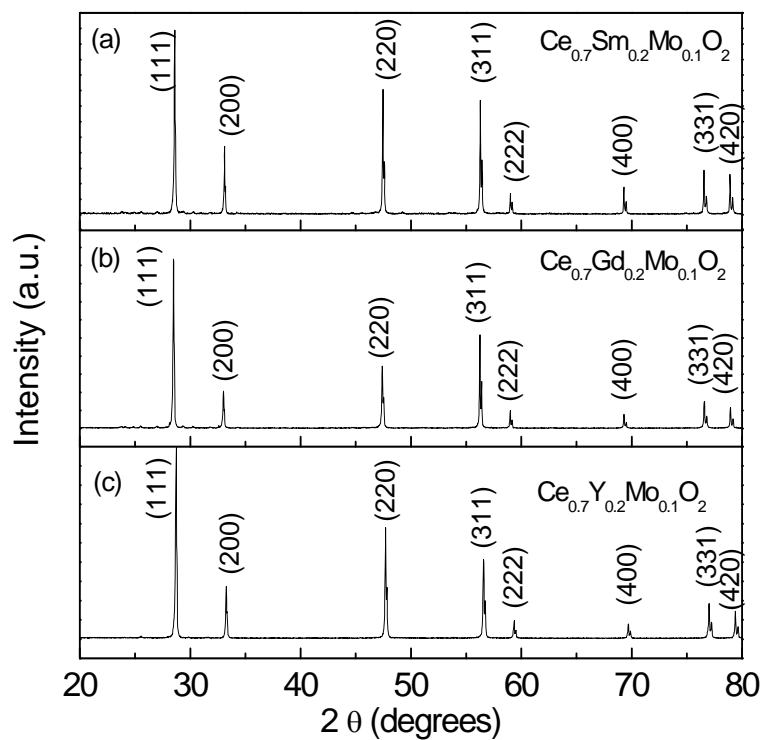

**Fig. S1** PXRD patterns of (a)  $\text{Ce}_{0.7}\text{Sm}_{0.2}\text{Mo}_{0.1}\text{O}_2$  (b)  $\text{Ce}_{0.7}\text{Gd}_{0.2}\text{Mo}_{0.1}\text{O}_2$  and (c)  $\text{Ce}_{0.7}\text{Y}_{0.2}\text{Mo}_{0.1}\text{O}_2$  prepared in air at elevated temperatures.

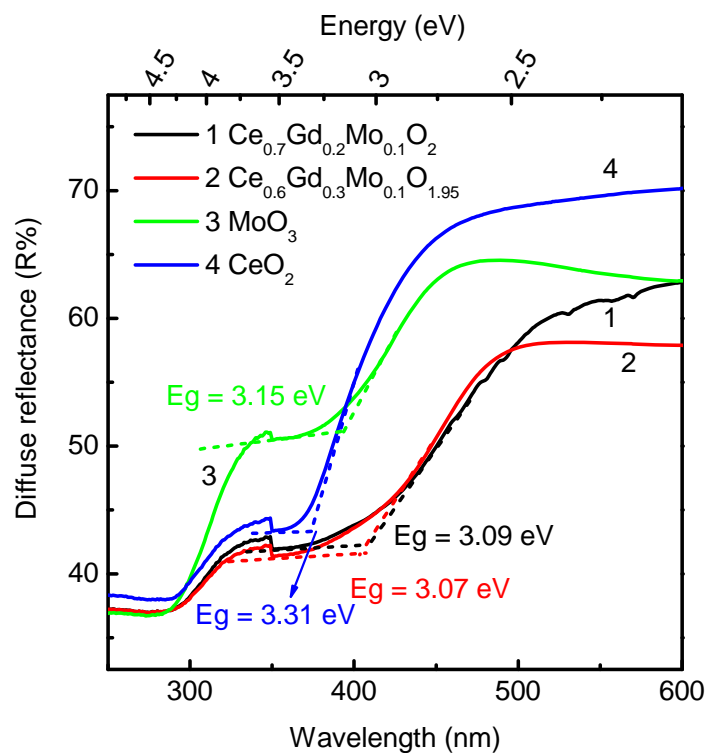

**Fig. S2** Diffuse reflectance spectra of as prepared  $\text{Ce}_{0.7}\text{Gd}_{0.2}\text{Mo}_{0.1}\text{O}_2$  and  $\text{Ce}_{0.6}\text{Gd}_{0.3}\text{Mo}_{0.1}\text{O}_{1.95}$ . For comparison, the starting materials are also given. Band value was estimated as described in ref. (65).

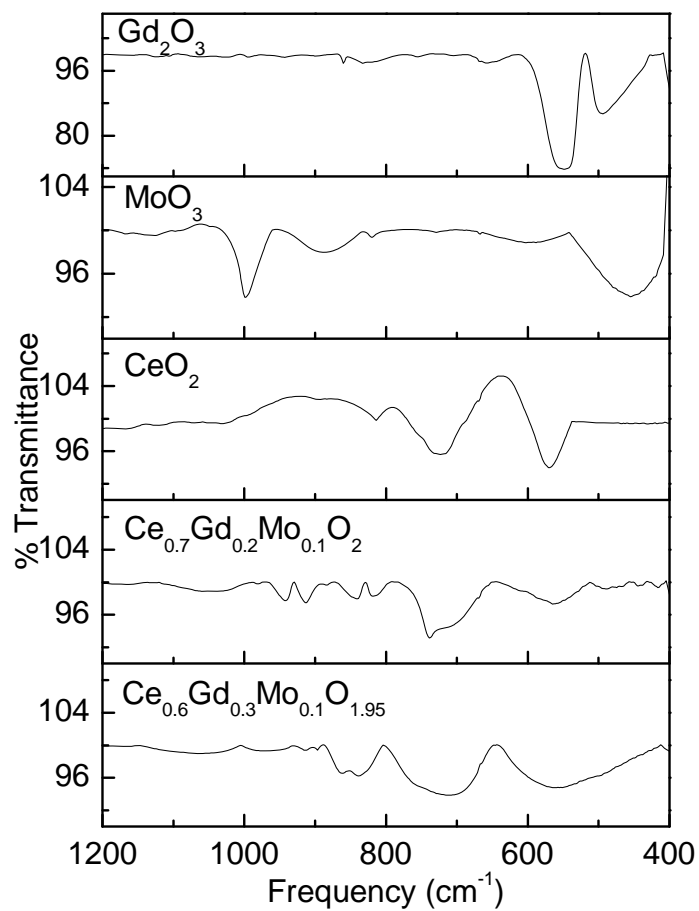

**Fig. S3** FTIR spectra of as prepared  $\text{Ce}_{0.7}\text{Gd}_{0.2}\text{Mo}_{0.1}\text{O}_2$  and  $\text{Ce}_{0.6}\text{Gd}_{0.3}\text{Mo}_{0.1}\text{O}_{1.95}$ . For comparison, the starting materials are also given.

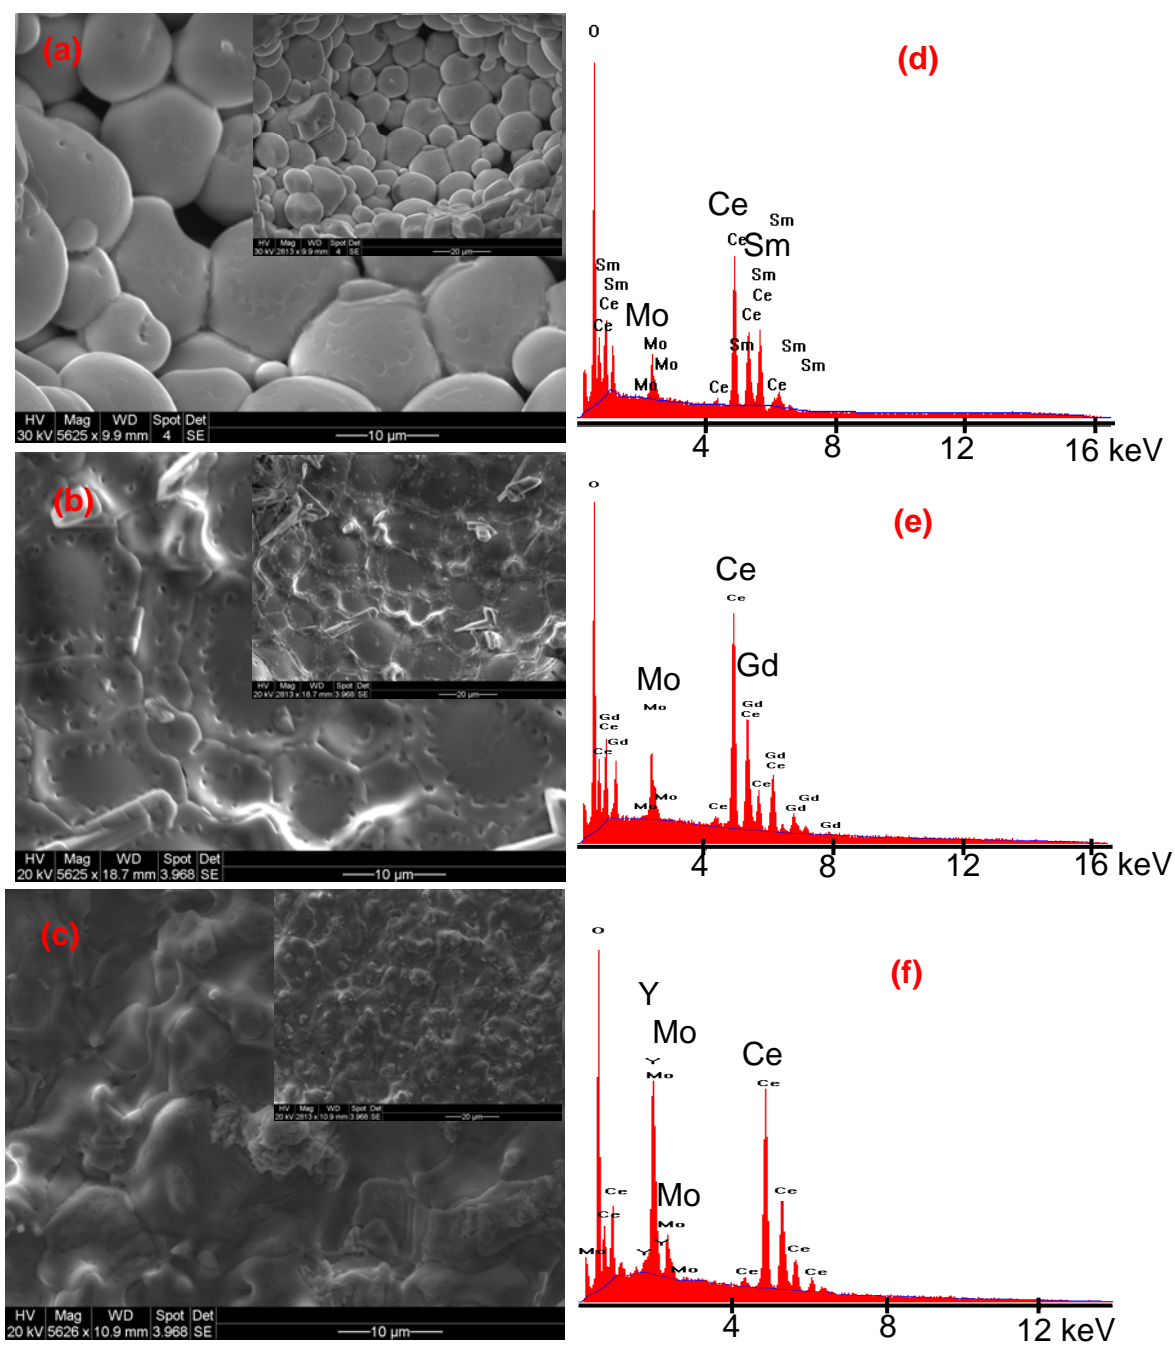

**Fig. S4** Scanning electron microscopy (SEM) images (10  $\mu\text{m}$ ) of as-prepared  $\text{Ce}_{0.7}\text{RE}_{0.2}\text{Mo}_{0.1}\text{O}_2$  (a) = Sm; (b) = Gd and (c) = Y. Insets show the diagram at 20  $\mu\text{m}$ . Their corresponding EDX images are given in (d) – (f).



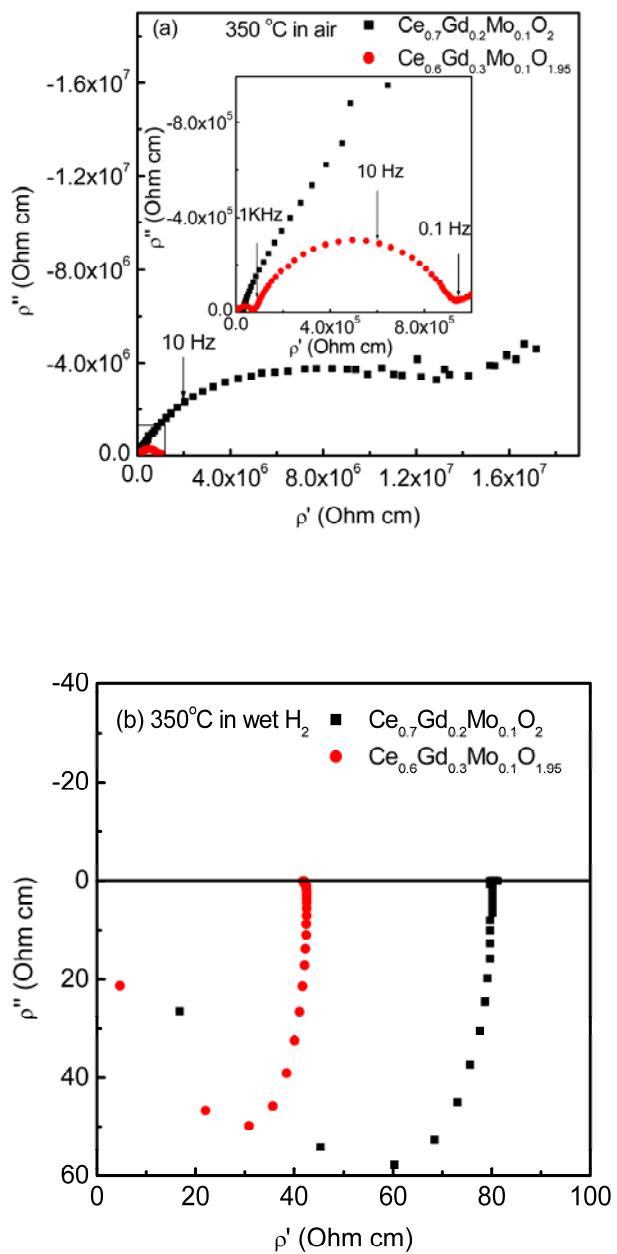

**Fig. S5** Typical AC resistivity plots of  $\text{Ce}_{0.7}\text{Gd}_{0.2}\text{Mo}_{0.1}\text{O}_2$  and  $\text{Ce}_{0.6}\text{Gd}_{0.3}\text{Mo}_{0.1}\text{O}_2$  at 350 °C in (a) air and (b) wet  $\text{H}_2$ . Insets show the expanded view.

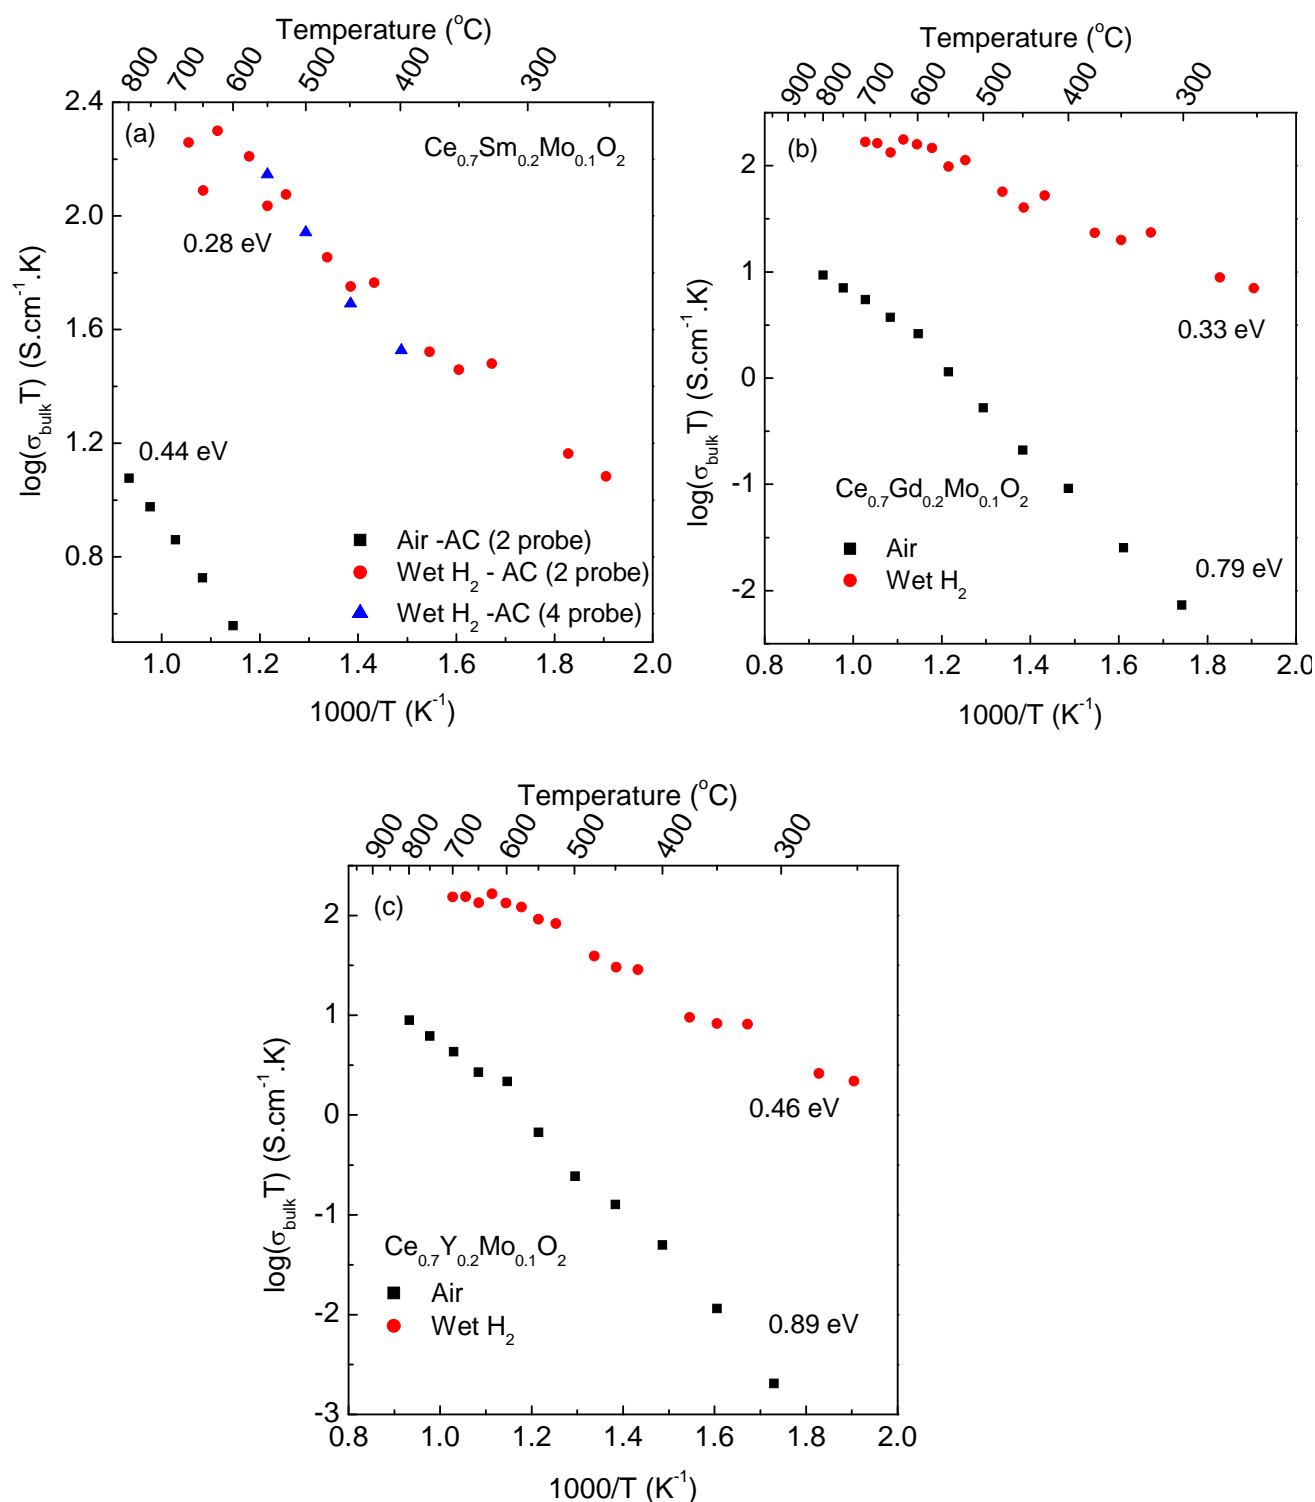

**Fig. S6** Arrhenius plots for bulk electrical conductivity of (a)  $\text{Ce}_{0.7}\text{Sm}_{0.2}\text{Mo}_{0.1}\text{O}_2$  (b)  $\text{Ce}_{0.7}\text{Gd}_{0.2}\text{Mo}_{0.1}\text{O}_2$  and (c)  $\text{Ce}_{0.7}\text{Y}_{0.2}\text{Mo}_{0.1}\text{O}_2$  in air and wet  $\text{H}_2$  determined by 2-probe electrical measurements using Pt electrodes. About four to five orders of magnitude higher electrical conductivity was observed in wet  $\text{H}_2$ . For comparison, 4-probe DC electrical conductivity data in wet  $\text{H}_2$  was included.

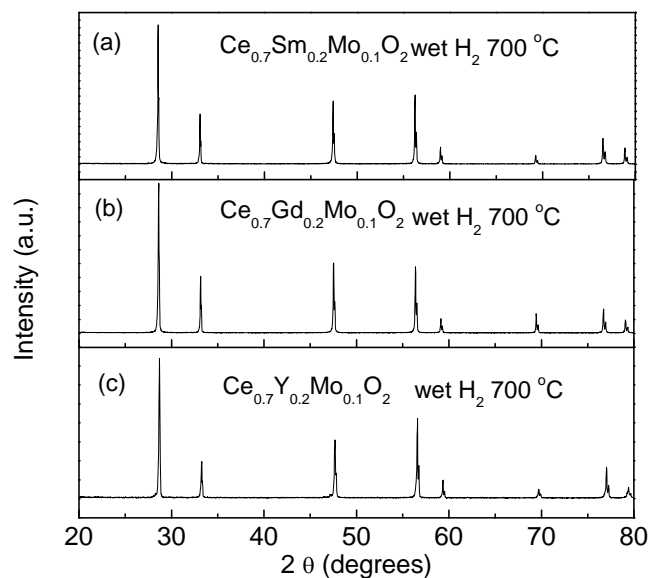

**Fig. S7** Powder X-ray diffraction patterns of (a)  $\text{Ce}_{0.7}\text{Sm}_{0.2}\text{Mo}_{0.1}\text{O}_2$  (b)  $\text{Ce}_{0.7}\text{Gd}_{0.2}\text{Mo}_{0.1}\text{O}_2$  and (c)  $\text{Ce}_{0.7}\text{Y}_{0.2}\text{Mo}_{0.1}\text{O}_2$  after AC impedance measurement up to 700°C in wet  $\text{H}_2$ .

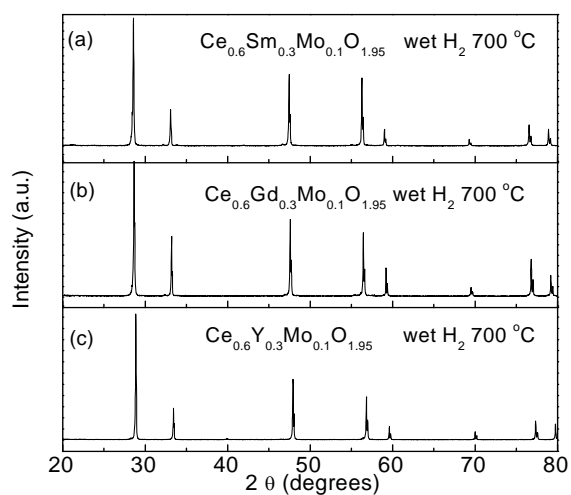

**Fig. S8** Powder X-ray diffraction patterns of (a)  $\text{Ce}_{0.6}\text{Sm}_{0.3}\text{Mo}_{0.1}\text{O}_{1.95}$  (b)  $\text{Ce}_{0.6}\text{Gd}_{0.3}\text{Mo}_{0.1}\text{O}_{1.95}$  and (c)  $\text{Ce}_{0.6}\text{Y}_{0.3}\text{Mo}_{0.1}\text{O}_{1.95}$  after AC impedance measurement up to 700°C in wet  $\text{H}_2$ .

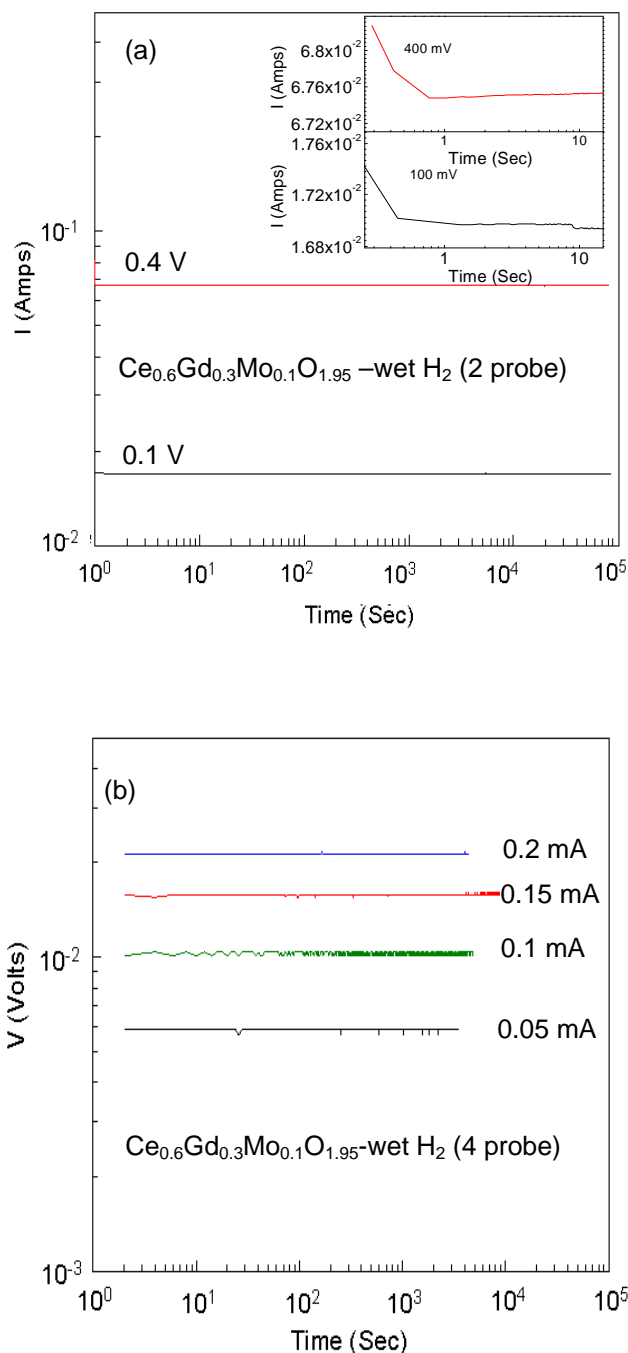

**Fig. S9** (a) Typical variation of electrical current as a function of time of  $\text{Ce}_{0.6}\text{Gd}_{0.3}\text{Mo}_{0.1}\text{O}_{1.95}$  in wet  $\text{H}_2$  at 450 °C for the 2- probe DC measurement with the applied potential of 0.1 V and 0.4 V. It demonstrates that an initial transient current converges on a steady-state current for an applied bias of 0.1 and 0.4 V at 450 °C. For clarity, we have shown both current and time in the log scale. A steady state current was observed within 1 Sec. In (b), we show the variation of voltage as a function of time for  $\text{Ce}_{0.6}\text{Gd}_{0.3}\text{Mo}_{0.1}\text{O}_{1.95}$  in wet  $\text{H}_2$  at 450 °C using the 4-probe DC measurement. A similar behavior was observed for the Sm and Y compounds.

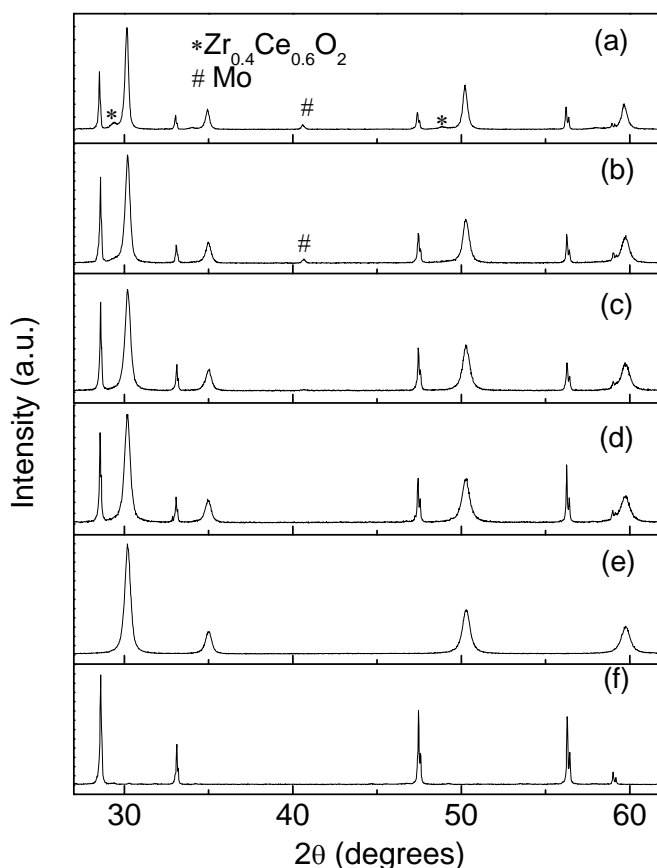

**Fig. S10** PXRD patterns showing the chemical stability of  $\text{Ce}_{0.7}\text{Sm}_{0.2}\text{Mo}_{0.1}\text{O}_2$  with YSZ after sintering the reaction mixture (1:1 weight ratio) at (a) 1000°C, (b) 900°C and (c) 800°C in wet  $\text{H}_2$  for 24 h. For comparison, (d) the mixture of  $\text{Ce}_{0.7}\text{Sm}_{0.2}\text{Mo}_{0.1}\text{O}_2$  with YSZ, (e) the starting materials YSZ powders and (f) as-prepared  $\text{Ce}_{0.7}\text{Sm}_{0.2}\text{Mo}_{0.1}\text{O}_2$  are shown. New phases due to Mo (JCPDS Card No 42- 1120) and  $\text{Zr}_{0.4}\text{Ce}_{0.6}\text{O}_2$  (JCPDS Card No. 38-1439) are marked with \* and #, respectively.

## References

- 60 S. Sathyamurthy, K. J. Leonard, R. T. Dabestani, and M. P. Paranthaman, *Nanotechnology* 2005, **16**, 1960.
- 61 A. Bensalem, G. Shafeev, and F. Bozon-Verduraz, *Catalysis Letters* 1993, **18**, 165.
- 62 D. E. Zhang, X. J. Zhang, X. M. Ni, J. M. Song, and H. G. Zheng, *Chem. Phys. Chem.* 2006, **7**, 2468.
- 63 F. Cheviré, C. Muñoz, C. F. Baker, F. Tessier, O. Larcher, S. Boujday, C. Colbeau-Justin, and R. Marchand, *J. Solid State Chem.* 2006, **179**, 3184.
- 64 T. V. Semikina, *Semiconductor Physics, Quantum Electronics & Optoelectronics*. 2004, **7**, 291.
- 65 T. Y. Ma, Z. Y. Yuan, and J. L. Cao, *Eur. J. Inorg. Chem.* 2010, 716.
- 66 C. Julien, O Mohammad Hussain, L. El-Farh, and M. Balkanski, *Solid State Ionics* 1992, **53-56**, 400.
- 67 M. Yahaya, M. M. Salleh, and I. A. Talib, *Solid State Ionics* 1998, **113-115**, 421.
- 68 T. Toyoda, H. Nakanishi, S. Endo, and T. Irie, *J. Phys. D: Appl. Phys.* 1985, **18**, 747.
- 69 Y. Zhao, J. G. Liu, Y. Zhou, Z. J. Zhang, Y. H. Xu, H. Naramoto, and S. Yamamoto, *J. Phys.: Condens. Matter*. 2003, **15**, L547.
- 70 T. S. Sian and G. B. Reddy, *Solar Energy Materials and Solar Cells* 2004, **82**, 375.
